# Supplementary material for: The safety of obstetric acupuncture: forbidden points revisited
Source: PubMed Central journal article supplement — Acupunct Med. 2015 Sep 11;33(5):413–9. doi: 10.1136/acupmed-2015-010936 (PMC4680134; doi:10.1136/acupmed-2015-010936), 2015-09-11
Supplement: acupmed-2015-010936-s1.pdf [file acupmed-2015-010936-s1.pdf]

## Web-Only References

w1. Coulon C, Poleszczuk M, Paty-Montaigne MH, *et al.* Version of breech fetuses by moxibustion with acupuncture: a randomized controlled trial. *Obstet Gynecol* 2014;**124**:32-9.

w2. Guerreiro da Silva JB, Nakamura MU, Cordeiro JA, *et al.* Acupuncture for tension-type headache in pregnancy: a prospective, randomised, controlled study. *Eur J Integr Med* 2012;**4**:366-70.

w3. Guerreiro da Silva JB, Nakamura MU, Cordeiro JA, *et al.* Acupuncture for dyspepsia in pregnancy: a prospective, randomised, controlled study. *Acupunct Med* 2009;**27**:50-3.

w4. Elden H, Fagevik-Olsen M, Ostgaard HC, *et al.* Acupuncture as an adjunct to standard treatment for pelvic girdle pain in pregnant women: randomised double-blinded controlled trial comparing acupuncture with non-penetrating sham acupuncture. *BJOG* 2008;**115**:1655-68.

w5. Neri I, De Pace V, Venturini P, *et al.* Effects of three different stimulations (acupuncture, moxibustion, acupuncture plus moxibustion) of BL.67 acupoint at small toe on fetal behavior of breech presentation. *Am J Chin Med* 2007;**35**:27-33.

w6. Lund I, Lundeberg T, Lonnberg L, *et al.* Decrease of pregnant women's pelvic pain after acupuncture: a randomized controlled single-blind study. *Acta Obstet Gynecol Scand* 2006;**85**:12-9.

w7. Elden H, Ladfors L, Olsen MF, *et al.* Effects of acupuncture and stabilising exercises as adjunct to standard treatment in pregnant women with pelvic girdle pain: randomised single blind controlled trial. *BMJ* 2005;**330**:761.

w8. Elden H, Ostgaard HC, Fagevik-Olsen M, *et al.* Treatments of pelvic girdle pain in pregnant women: adverse effects of standard treatment, acupuncture and stabilising exercises on the pregnancy, mother, delivery and the fetus/neonate. *BMC Complement Altern Med* 2008;**26**:34.

w9. Guerreiro da Silva JB, Nakamura MU, Cordeiro JA, *et al.* Acupuncture for insomnia in pregnancy--a prospective, quasi-randomised, controlled study. *Acupunct Med* 2005;**23**:47-51.

w10. Guerreiro da Silva JB, Nakamura MU, Cordeiro JA, *et al.* Acupuncture for low back pain in pregnancy--a prospective, quasi-randomised, controlled study. *Acupunct Med* 2004;**22**:60-7.

w11. Kvorning N, Holmberg C, Grennert L, *et al.* Acupuncture relieves pelvic and low-back pain in late pregnancy. *Acta Obstet Gynecol Scand* 2004;**83**:246-50.

w12. Neri I, Airola G, Contu G, *et al.* Acupuncture plus moxibustion to resolve breech presentation: a randomized controlled study. *J Matern Fetal Neonatal Med* 2004;**15**:247-52.

w13. Habek D, Cerkez Habek J, Jagust M. Acupuncture conversion of fetal breech presentation. *Fetal Diagn Ther* 2003;**18**:418-21.

w14. Neri I, Fazzio M, Menghini S, *et al.* Non-stress test changes during acupuncture plus moxibustion on BL67 point in breech presentation. *J Soc Gynecol Investig* 2002;**9**:158-62.

w15. Wedenberg K, Moen B, Norling A. A prospective randomized study comparing acupuncture with physiotherapy for low-back and pelvic pain in pregnancy. *Acta Obstet Gynecol Scand* 2000;**79**:331-5.

w16. Li Q, Wang L. Clinical observation on correcting malposition of fetus by electro-acupuncture. *J Tradit Chin Med* 1996;**16**:260-2.
